# Supplementary material for: Rapid colorimetric discrimination of cyanide ions – mechanistic insights and applications
Source: Royal Society of Chemistry journal article supplement (doi:10.1039/d1ay02040d), 2022-01-01
Supplement: d1ay02040d1.pdf [file d1ay02040d1.pdf]

## Supporting information

# Rapid Colorimetric Discrimination of Cyanide Ions – Mechanistic Insights and Applications

Arunkumar Kathiravan,<sup>1\*</sup> Selvaraj Sengottiyar,<sup>2</sup> Tomasz Puzyn,<sup>2</sup> Pushparathinam Gopinath,<sup>3</sup> Kanagachidambaresan Ramasubramanian,<sup>4</sup> Praveen Ayyappan Susila,<sup>5</sup> Mariadoss Asha Jhonsi<sup>6\*</sup>

<sup>1</sup>Department of Chemistry, Vel Tech Rangarajan Dr Sagunthala R & D Institute of Science and Technology, Avadi, Chennai - 600 062, Tamil Nadu, India

<sup>2</sup>Laboratory of Environmental Chemometrics, Faculty of Chemistry, University of Gdansk, Wita Stwosza 63, Gdansk, 80-308 Poland

<sup>3</sup>Department of Chemistry, SRM-Institute of Science and Technology, Kattankulathur, Chennai 603203, Tamil Nadu, India

<sup>4</sup>Department of Computer Science and Engineering, Vel Tech Rangarajan Dr Sagunthala R & D Institute of Science and Technology, Avadi, Chennai - 600 062, Tamil Nadu, India

<sup>5</sup>Department of Mechanical Engineering, Vel Tech Rangarajan Dr Sagunthala R & D Institute of Science and Technology, Avadi, Chennai - 600 062, Tamil Nadu, India

<sup>6</sup>Department of Chemistry, B. S. Abdur Rahman Crescent Institute of Science and Technology, Chennai-600 048, Tamil Nadu, India

### Corresponding Authors

\*E-mail: [akathir23@gmail.com](mailto:akathir23@gmail.com) (Dr. A. Kathiravan)

\*E-mail: [jhonsiasha@gmail.com](mailto:jhonsiasha@gmail.com) (Dr. M. Asha Jhonsi)

**Table S1:** Computed  $\lambda_{\text{max}}$  values with different functional and basis set for DMN probe. The experimental  $\lambda_{\text{max}}$  value is 645 nm.

| Functional | Basis set | $\lambda_{\text{max}}$ (nm) |
|------------|-----------|-----------------------------|
| B3LYP      | 6-31G     | 663                         |
|            | 6-31+G    | 681                         |
|            | 6-31+G*   | 622                         |
|            | 6-311G    | 661                         |
|            | 6-311+G   | 673                         |
| BP86       | 6-31G     | 874                         |
| CAM-B3LYP  | 6-311G    | 618                         |
| M06-2X     | 6-31G     | 635                         |
| B3P86      | 6-31G     | 740                         |
| PBE        | 6-31G     | 870                         |

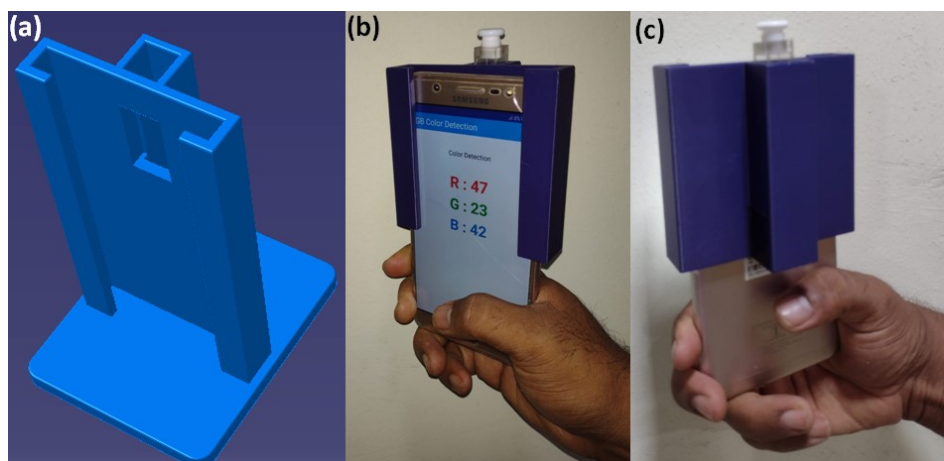

**Scheme S1:** 3D printed portable module (a) exploded view, (b) front and (c) back view of the 3D module mounted on a smartphone.

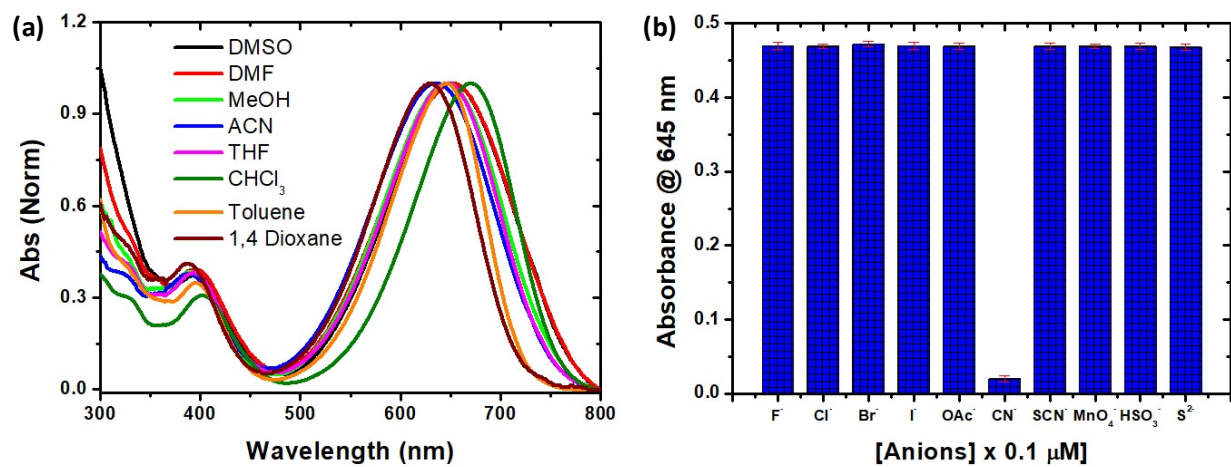

**Figure S1:** (a) absorption spectrum of DMN in various solvents, (b) selectivity of DMN probe with various analytes.

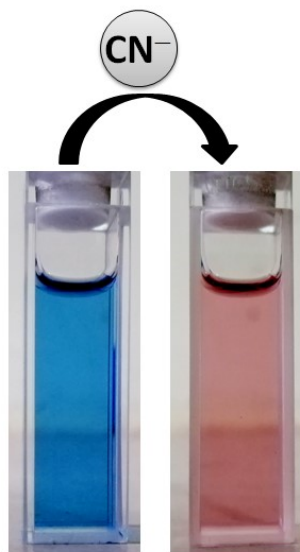

**Figure S2:** Colorimetric change of DMN probe in the presence of cyanide ions.

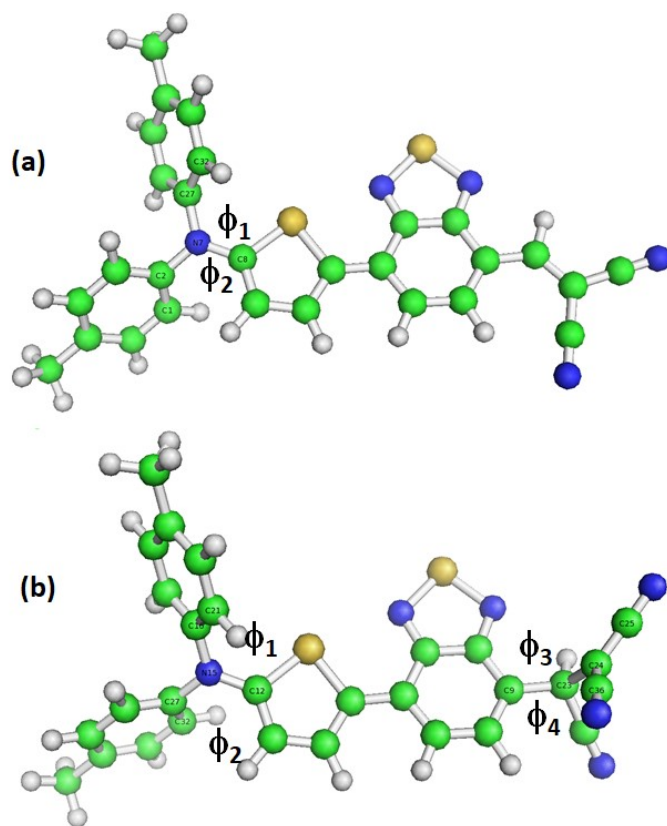

**Figure S3:** The geometry optimized structures of (a) DMN and (b) with CN.
